# Supplementary material for: A silver on 2D white-C3N4support photocatalyst for mechanistic insights: synergetic utilization of plasmonic effect for solar hydrogen evolution
Source: Royal Society of Chemistry journal article supplement (doi:10.1039/c6ra23964a), 2016-01-01
Supplement: c6ra23964a1.pdf [file c6ra23964a1.pdf]

## *Supplementary Information*

### **Silver on 2D White-C<sub>3</sub>N<sub>4</sub> Support Photocatalyst for Mechanism Insight: Synergetic Utilization of Plasmonic Effect for Solar Hydrogen Evolution**

Jianjian Yi<sup>1</sup>, Xiaojie She<sup>1</sup>, Yanhua Song<sup>2</sup>, Hui Xu<sup>\*1</sup>, Peng Zhang<sup>3</sup>, Zhao Mo<sup>1</sup>, Liang Liu<sup>1</sup>, Daolin Du<sup>1</sup>, Huaming Li<sup>\*1</sup>

*1. School of the Environment and Safety Engineering, Institute for Energy Research, Jiangsu University, Zhenjiang 212013, P. R. China*

*2. School of Environmental and Chemical Engineering, Jiangsu University of Science and Technology, Zhenjiang 212003, P. R. China*

*3. Institute of Advanced Materials, Jiangsu University, Zhenjiang 212013, P. R. China*

**\*Corresponding author:** Tel.:+86-511-88791800; Fax: +86-511-88791708;

E-mail address: [xh@ujs.edu.cn](mailto:xh@ujs.edu.cn), [lihm@ujs.edu.cn](mailto:lihm@ujs.edu.cn)

## **Computational methods.**

Spin-polarized DFT calculations were performed using the DMol<sup>3</sup> code.<sup>1,2</sup> The well-known Perdew-Burke-Ernzerhof (PBE) functional with generalized gradient approximation (GGA) is used as the exchange-correlation functional.<sup>3</sup> The core electrons are described by the all electron relativistic (AER) core treat method.<sup>4</sup> The double numerical plus polarization (DNP) is chosen as the atomic orbital basis set.<sup>1</sup> A smearing of 0.005 Ha is applied to the orbital occupation. The convergence tolerances of energy, maximum force and displacement are  $1.0 \times 10^{-5}$  Ha, 0.002 Ha/Å, and 0.005 Å, respectively. The Ag (100) surface is modeled by a p(2×2) cell with seven layer Ag slab. The middle three layers are fixed at their bulk positions and the remaining atoms are allowed to relax fully. For monolayer g-C<sub>3</sub>N<sub>4</sub>, a orthorhombic supercell is constructed as  $7.130 \times 7.130 \times 20.000$  Å<sup>3</sup>.

## **Photocatalytic activity**

For photocatalytic degradation experiment, the organic dye methyl orange (MO) was used as a model pollutant. In detail, 15 mg samples were added into 50 ml MO (10 mg/L) in a Pyrex photocatalytic reactor with a circulating water system to maintain a constant temperature (30°C). Before irradiation, the suspensions were magnetically stirred for 30 min in the dark to ensure that MO could reach the absorption-desorption equilibrium on the photocatalyst surface. At certain time intervals, 3 mL aliquots were sampled and centrifuged to remove the photocatalyst particles. Then the filtrates were analyzed by recording variations of the absorption band maximum (464 nm) in the UV-vis spectra of MO using a UV-vis spectrophotometer (UV-2450 Shimadzu). The air velocity was 2 L/min and the photocatalytic reaction was performed under a 300W Xe lamp with a 400 nm cutoff filter.

## **Characterization.**

The transmission electron microscopy (TEM) images were recorded on a JEOL-JEM-2010 (JEOL, Japan) operated at 200 kV. The powder X-ray diffraction (XRD) patterns was recorded using a Bruker D8 diffractometer with Cu K $\alpha$  radiation ( $\lambda = 1.5418$  Å) in the range of  $2\theta = 10-80^\circ$ . X-ray photoelectron spectroscopy (XPS)

analysis was performed on an ESCALab MKII X-ray photoelectron spectrometer using Mg K $\alpha$  radiation. The Fourier transform infrared spectra (FT-IR) of the samples were recorded using a Nicolet Nexus 470 spectrometer. Ultraviolet visible (UV-vis) diffuse reflection spectra were measured using a UV-vis spectrophotometer (Shimadzu UV-2450, Japan) in the range of 200-800 nm. BaSO<sub>4</sub> was used as a reflectance standard material. The photoluminescence (PL) spectra of the samples were obtained by a QuantaMaster & TimeMaster Spectrofluorometer. Electron spin resonance (ESR) spectra were conducted on a Bruker model ESR JES-FA200 spectrometer.

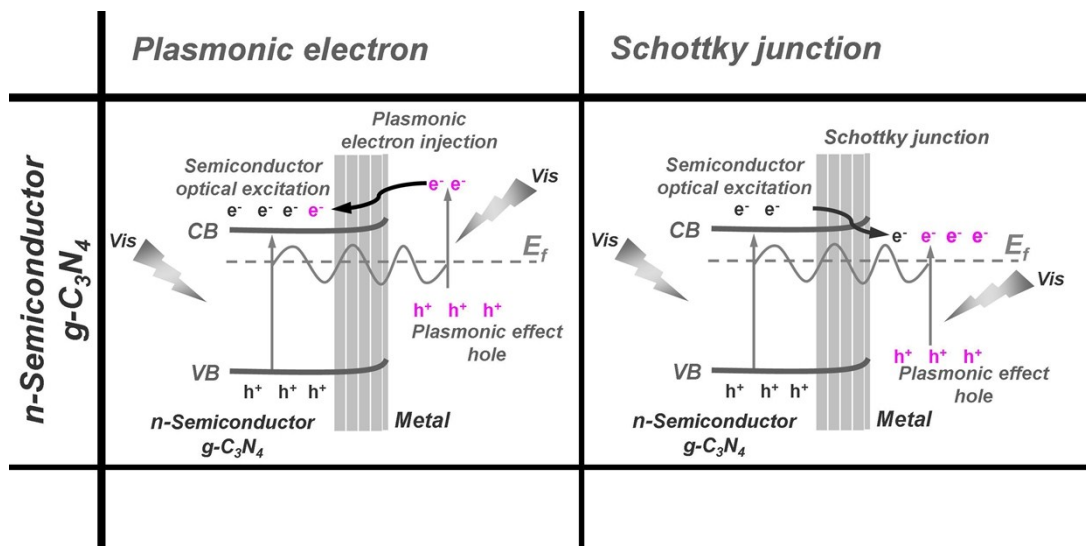

**Figure S1.** Schematic illustrations for band diagrams illustrating the charge migration driven by the plasmonic effect and Schottky junction in the metal-(n-type) semiconductor (n-type  $g\text{-C}_3\text{N}_4$ ), respectively.

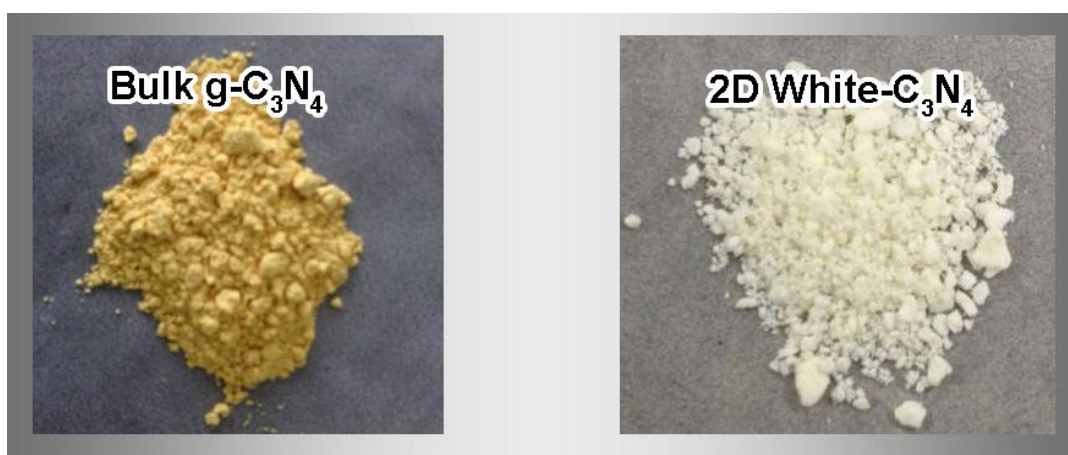

**Figure S2.** Photographs of the bulk  $g\text{-C}_3\text{N}_4$  and 2D White- $\text{C}_3\text{N}_4$ .

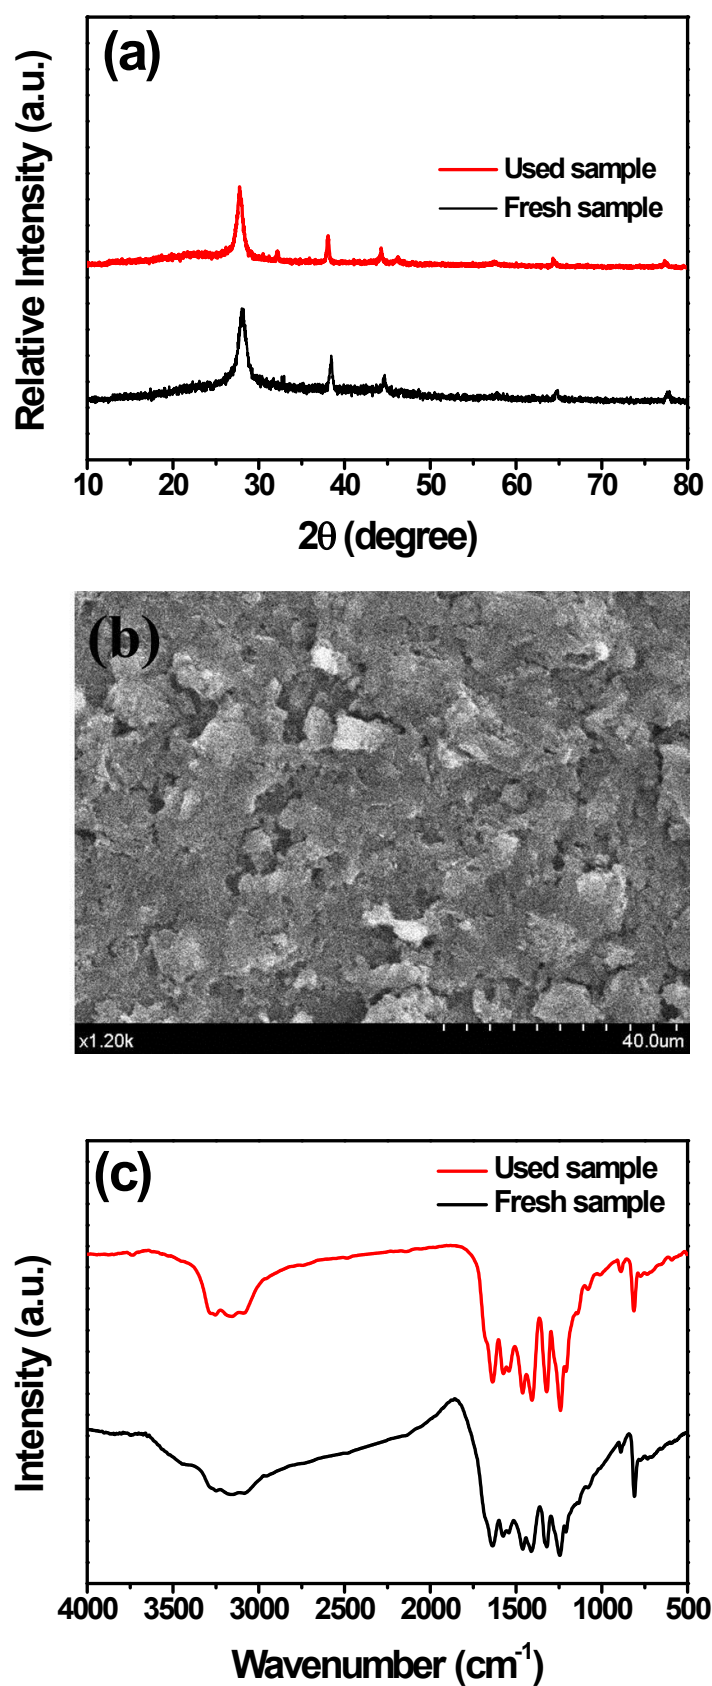

**Figure S3.** (a) The XRD patterns, (b) SEM image and (c) FT-IR spectra of the used 2% Ag/2D White- $\text{C}_3\text{N}_4$  photocatalyst.

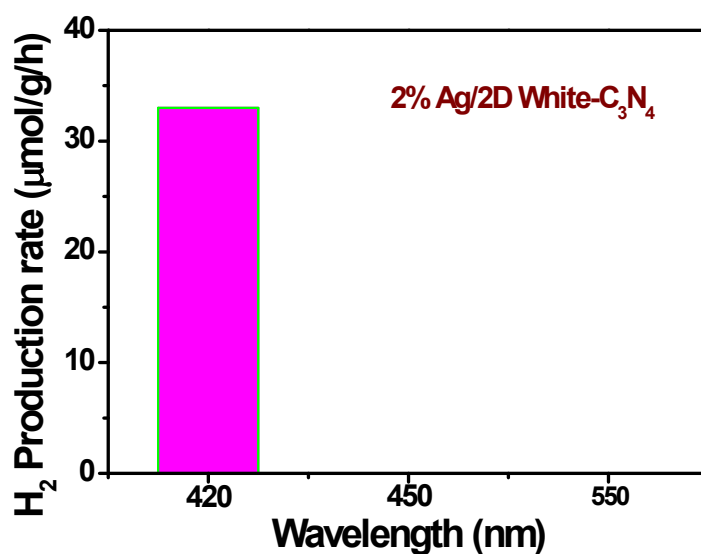

**Figure S4.** The wavelength-dependent H<sub>2</sub> evolution by using 2% Ag/2D White-C<sub>3</sub>N<sub>4</sub>.

**Figure S4** exhibits the wavelength-dependent H<sub>2</sub> evolution by using 2% Ag/2D White-C<sub>3</sub>N<sub>4</sub>. When the sample was irradiated under  $\lambda=420$  nm, the H<sub>2</sub> production rate was  $\sim 33.0$   $\mu\text{mol/g/L}$ . This value is quite lower than under  $\lambda>400$  nm irradiation ( $\sim 354.2$   $\mu\text{mol/g/L}$ ). The reason why the value decreases sharply is that Ag particles cannot be excited under  $\lambda=420$  nm. Thus, the hot electrons injection could not work. The H<sub>2</sub> cannot be generated using 2% Ag/2D White-C<sub>3</sub>N<sub>4</sub> under the irradiation ( $\lambda=450$  and 550 nm). For  $\lambda = 450$  nm irradiation, although metal Ag could be excited, 2D White-C<sub>3</sub>N<sub>4</sub> could not. For  $\lambda=550$  nm, neither metal Ag nor semiconductor 2D White-C<sub>3</sub>N<sub>4</sub> could not be excited.

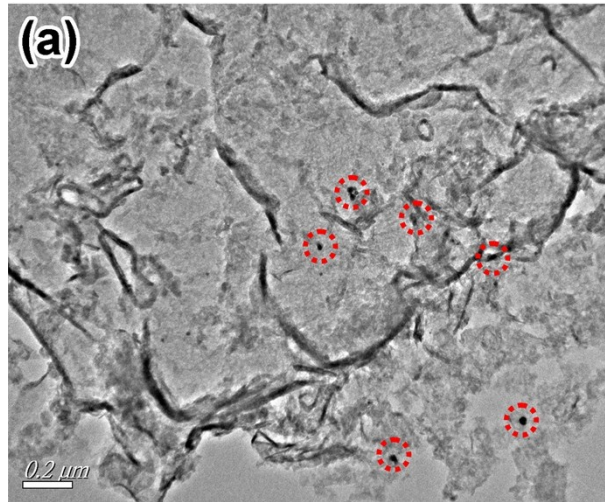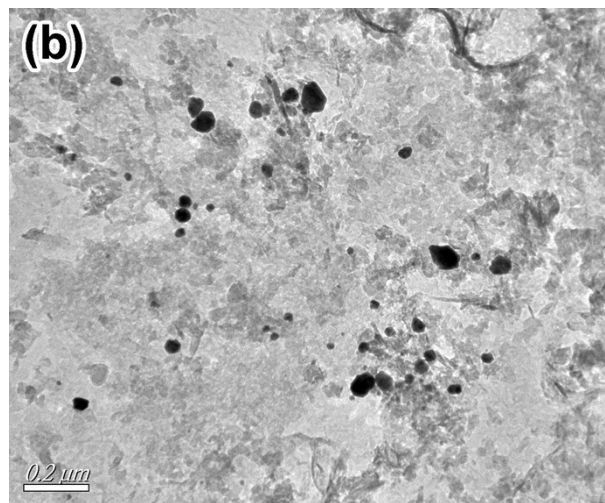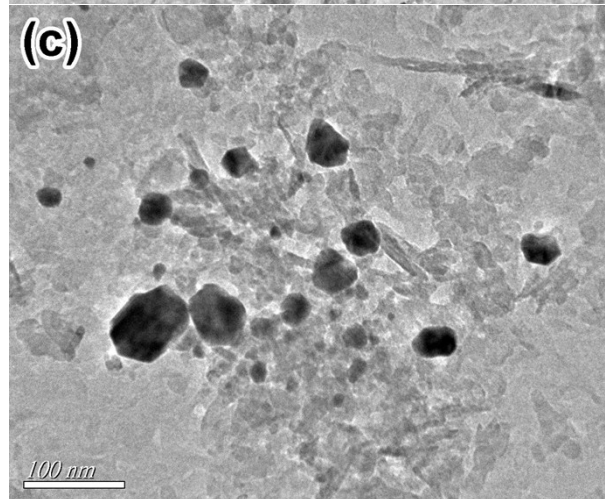

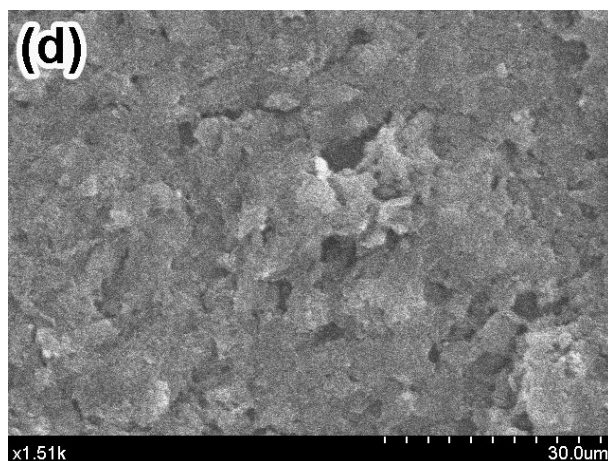

**Figure S5.** TEM images of (a) 1% Ag/2D White-C<sub>3</sub>N<sub>4</sub> and (b and c) 10% Ag/2D White-C<sub>3</sub>N<sub>4</sub>, (c) SEM image of 2% Ag/2D White-C<sub>3</sub>N<sub>4</sub>.

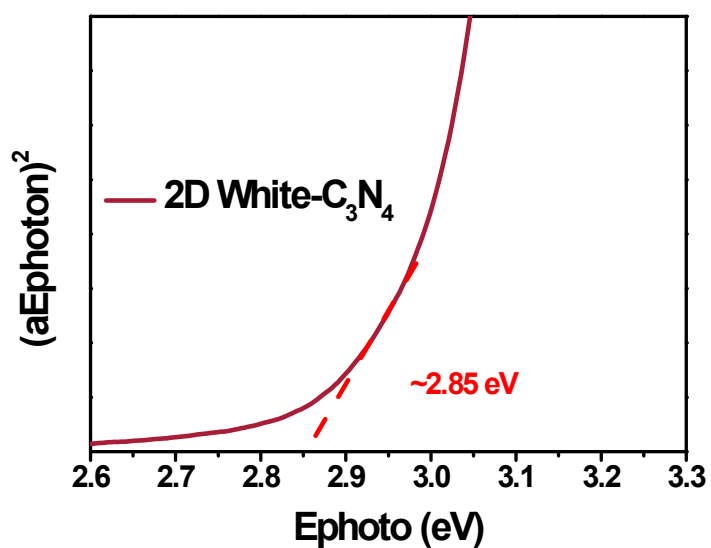

**Figure S6.** The estimated band gap of 2D White-C<sub>3</sub>N<sub>4</sub>.



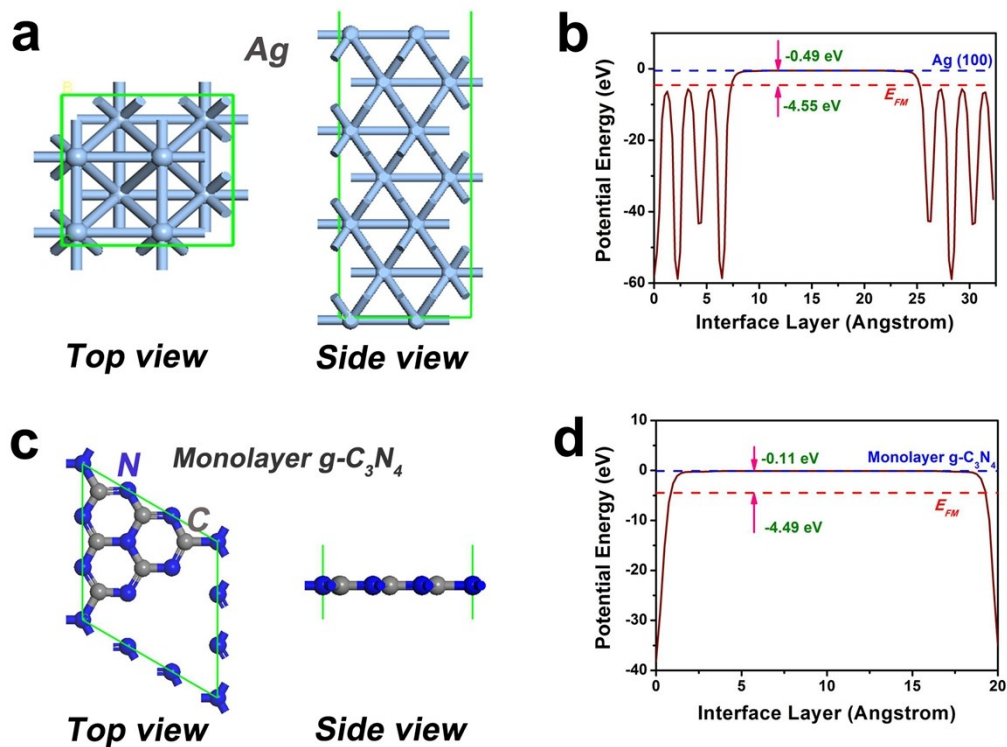

**Figure S7.** Simulation models of (a) Ag (100) and (c) monolayer  $g\text{-C}_3\text{N}_4$ , the potential diagrams of (b) Ag and (d) monolayer  $g\text{-C}_3\text{N}_4$ .

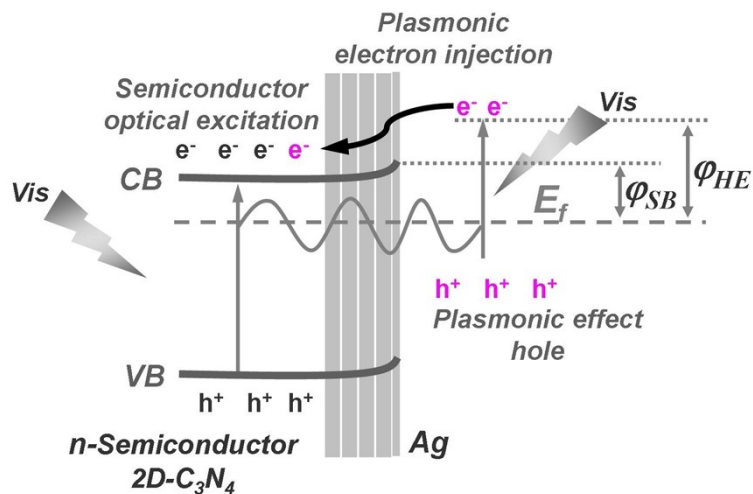

**Figure S8.** Schematic illustrations for injecting the hot electrons with energies high enough to CB of  $n\text{-Semiconductor } 2\text{D-C}_3\text{N}_4$ .

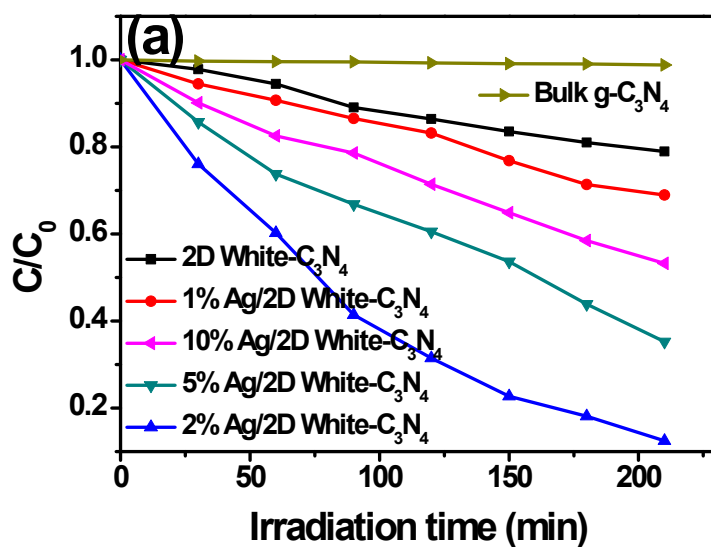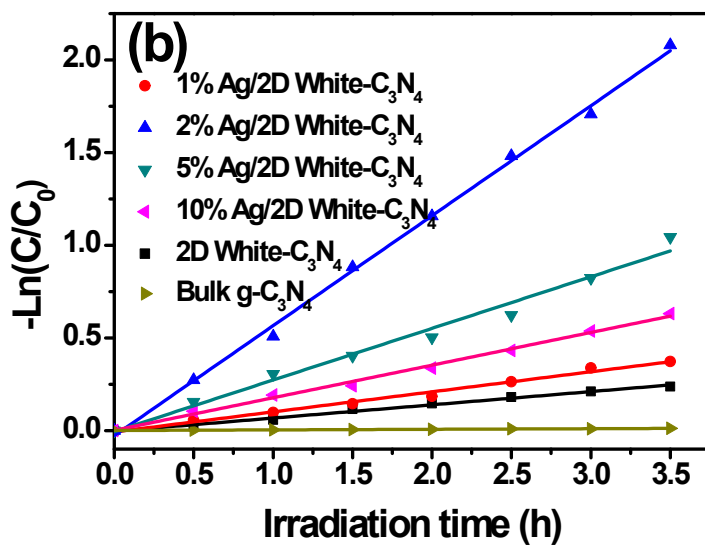

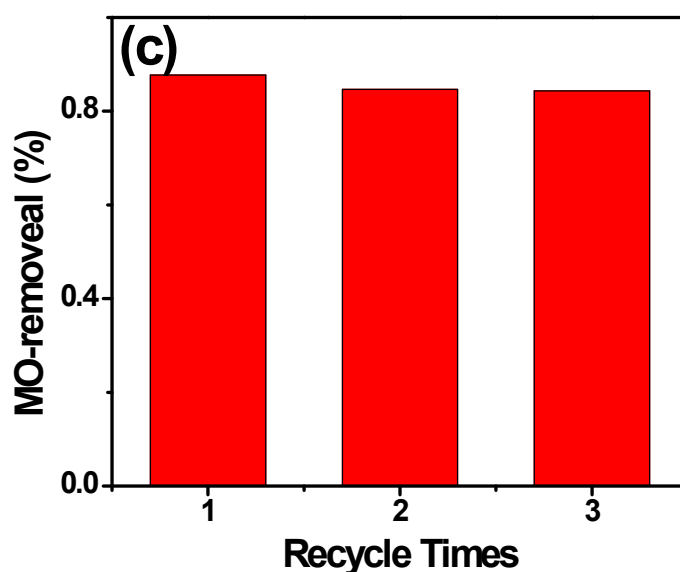

**Figure S9.** (a) The photocatalytic degradation of MO dye by the 0.015 g photocatalysts under visible light irradiation, (b) the kinetics of MO degradation using the bulk g-C<sub>3</sub>N<sub>4</sub>, 2D White-C<sub>3</sub>N<sub>4</sub> and Ag/2D White-C<sub>3</sub>N<sub>4</sub> under visible light irradiation, and (c) stability test of 2% Ag/2D White-C<sub>3</sub>N<sub>4</sub> for MO degradation under visible light irradiation.

**Figure S9a** shows the photocatalytic activities of the samples for degradation of MO under visible light irradiation. Obviously, after 3.5 h visible light irradiation, the photodegradation activity of the bulk g-C<sub>3</sub>N<sub>4</sub> was negligible for MO. And ~21% MO could be removed by 2D White-C<sub>3</sub>N<sub>4</sub>, which indicates that 2D structure is good for enhancing photocatalytic activity. When Ag was introduced into 2D White-C<sub>3</sub>N<sub>4</sub> nanosheet, the photodegradation activities of the samples were obviously improved. The 2% Ag/2D White-C<sub>3</sub>N<sub>4</sub> showed the best photodegradation activity. After 3.5 h visible light irradiation, it had ~66% improvement, in comparison to 2D White-C<sub>3</sub>N<sub>4</sub>. It is evident that 2D ultrathin structure and introduction of Ag are very significant for improving photocatalytic activity. The photodegradation activities of the samples correspond directly with photocatalytic H<sub>2</sub> evolution well. To understand the process of the photocatalysis reaction, the photodegradation kinetics of MO under visible light irradiation was analyzed. From **Figure S9b**, the linear relationship of  $-\ln(C/C_0)$  versus time follows first-order reaction dynamics under the experimental conditions.

$C$  and  $C_0$  is the MO concentrations at time 0 and  $t$ , respectively. The kinetic constant ( $k$ ) and regression coefficient ( $R^2$ ) were calculated and given in **Table S1**, which can be found that 2% Ag/2D White- $C_3N_4$  has the maximum apparent rate of  $0.5934\text{ h}^{-1}$ , which is  $\sim 185$  and 8 times higher than that of the bulk  $g\text{-}C_3N_4$  ( $0.0032\text{ h}^{-1}$ ) and 2D White- $C_3N_4$  ( $0.0714\text{ h}^{-1}$ ), respectively. In addition, the result in **Figure S9c** indicated that after 3 cycles, the photodegradation activity of 2% Ag/2D White- $C_3N_4$  only reduced a little, which could be ascribed to the loss of the sample during the experiments.

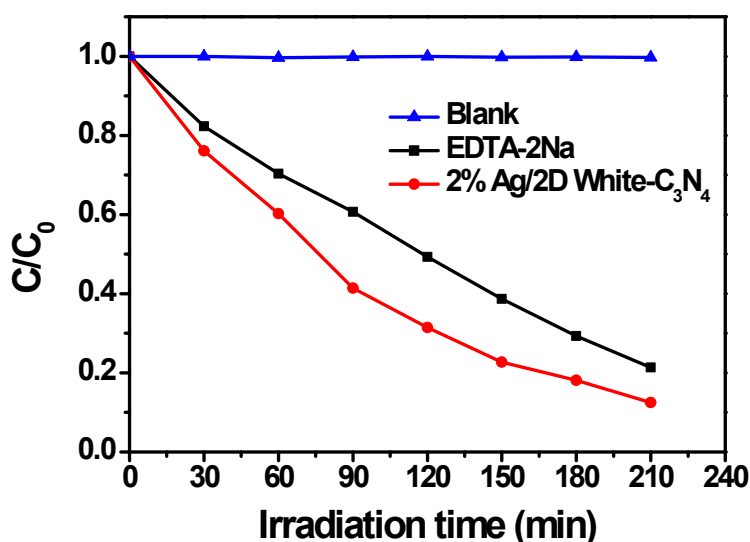

**Figure S10.** Comparison of photocatalytic activities of 2% Ag/2D White- $C_3N_4$  composite for the degradation of MO with or without adding EDTA-2Na under visible light irradiation.

The hole trapping experiment was carried out through adding the scavenger disodium ethylenediaminetetra acetate (EDTA-2Na) (**Figure S10**). Obviously, when EDTA-2Na was added, the degradation efficiency was inhibited. These results indicate that the holes and  $O_2^{\cdot-}$  play a role in photodegradation process and  $O_2^{\cdot-}$  is the main active species. For photodegradation reaction, when Ag/2D White- $C_3N_4$  is irradiated by visible light,  $O_2$  can be reduced into  $O_2^{\cdot-}$  with oxidize ability. These  $O_2^{\cdot-}$  and photogenerated holes can oxidize organic pollutant (MO) (**Figure S10b**). These cycles continue to happen, so photocatalytic reaction proceeds for both hydrogen evolution and photodegradation reaction.

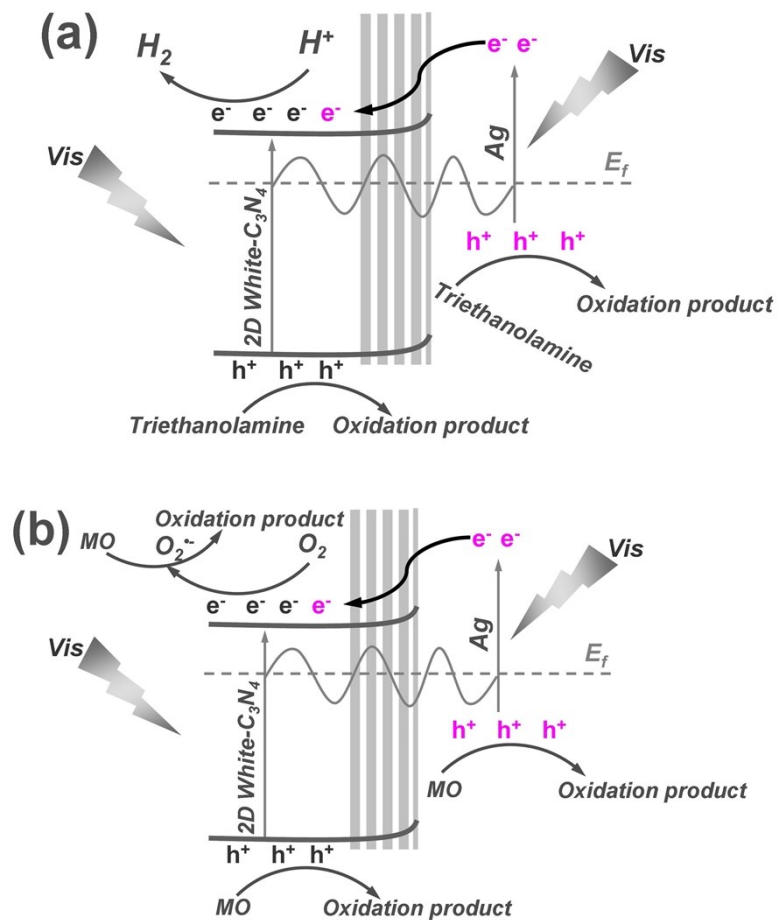

**Figure S11.** (a) and (b) Schematic illustration of proposed mechanism for the photocatalytic  $H_2$  evolution and the degradation of the pollutant by synergistic utilization plasmonic effect.

**Table S1.** Kinetic constants and regression coefficients of MO degradation under visible light irradiation.

| <b>Photocatalysts</b>                         | <b>Kinetic constant (<math>k</math> (<math>\text{h}^{-1}</math>))</b> | <b><math>R^2</math></b> |
|-----------------------------------------------|-----------------------------------------------------------------------|-------------------------|
| Bulk g-C <sub>3</sub> N <sub>4</sub>          | 0.0032                                                                | 0.9845                  |
| 2D White-C <sub>3</sub> N <sub>4</sub>        | 0.0714                                                                | 0.9879                  |
| 1% Ag/2D White-C <sub>3</sub> N <sub>4</sub>  | 0.1082                                                                | 0.9879                  |
| 2% Ag/2D White-C <sub>3</sub> N <sub>4</sub>  | 0.5934                                                                | 0.9974                  |
| 5% Ag/2D White-C <sub>3</sub> N <sub>4</sub>  | 0.2786                                                                | 0.9802                  |
| 10% Ag/2D White-C <sub>3</sub> N <sub>4</sub> | 0.1761                                                                | 0.9943                  |

**Table S2** shows the BET surface area and pore volume of as-prepared samples. The BET surface areas of Ag/2D White-C<sub>3</sub>N<sub>4</sub> composites exhibit a gradual decrease with the increase of the content of Ag, which is due to the introduction of Ag. The photocatalytic activity of 2D white-C<sub>3</sub>N<sub>4</sub> is greatly increased, as its surface area is obviously increased compared with that of the bulk g-C<sub>3</sub>N<sub>4</sub>. Although, the surface areas of the composites is decreased with the comparison of that of 2D White-C<sub>3</sub>N<sub>4</sub>, the photocatalytic activities of the composites are greatly increased.

**Table S2.** BET surface area and pore volume of as-prepared samples.

| <b>Sample</b>                                 | <b>BET surface area<br/>[m<sup>2</sup>/g]</b> | <b>Pore volume<br/>[cm<sup>3</sup>/g]</b> |
|-----------------------------------------------|-----------------------------------------------|-------------------------------------------|
| Bulk g-C <sub>3</sub> N <sub>4</sub>          | 5.38                                          | 48.80                                     |
| 2D White-C <sub>3</sub> N <sub>4</sub>        | 264.70                                        | 48.61                                     |
| 1% Ag/2D White-C <sub>3</sub> N <sub>4</sub>  | 190.64                                        | 46.72                                     |
| 2% Ag/2D White-C <sub>3</sub> N <sub>4</sub>  | 183.94                                        | 46.63                                     |
| 5% Ag/2D White-C <sub>3</sub> N <sub>4</sub>  | 159.85                                        | 45.71                                     |
| 10% Ag/2D White-C <sub>3</sub> N <sub>4</sub> | 120.56                                        | 44.92                                     |

#### **References:**

1. B. Delley, *J. Chem. Phys.*, 1990, **92**, 508.
2. B. Delley, *J. Chem. Phys.*, 2000, **113**, 7756.

3. J. P. Perdew, K. Burke, M. Ernzerhof, *Phys. Rev. Lett.*, 1996, **77**, 3865.
4. D. D. Koelling, B. N. Harmon, *J. Phys. C: Solid State Phys.*, 1977, **10**, 3107.
